# Supplementary material for: Experiences of older patients before, during and after hospital admission: Patient Journey Mapping
Source: Research Square preprint supplement (doi:10.21203/rs.3.rs-7477102/v1), 2025-10-17
Supplement: Supplementary file 1 [file 1f77588e4502b5061ad7c2d9.docx]

**ADDITIONAL FILE 2: INTERVIEW GUIDE**

| Phase 1: Pre hospital phase | |
| --- | --- |
| Introduction | - **Name; Gender; Hospital (ward); Date of birth; Highest level of education; Living situation; Medical care** |
| Situation | - **Can you tell us how you ended up here and why you were admitted to the hospital?** |
| Physicians | **GP and specialist:**   - **Can you tell us how you got in contact with your general practitioner?** - **How long did it take before you could see your GP?**   **Ambulance:**   - **How long did it take for the ambulance to arrive?**   **ED:**   - **How long did you have to wait at the emergency department/out-of-hours GP service before you were helped?**   **Process:**   - **Can you tell us to what extent the doctor was aware of your situation?** - **Can you describe how the visit went at the …?**   - **Can you describe how the communication went?**   - **What was discussed with you? Did you miss any information?**   - **To what extent did you feel heard? Were you able to tell your story / did they listen to you?**   - **To what extent did you feel involved in the decisions that were made? (Example)**   - **To what extent were you given the opportunity to participate in decisions about your examinations/treatment?**   - **How did you experience the examinations/care you received?**   - **Can you say something about the doctor’s expertise?**   - **Can you describe how the referral (collaboration) went when you were sent to the hospital?**   **Experiences:**   - **Can you tell us more about your positive/negative experiences with the GP?**   **Improvement points and risks:**   - **Where do you see opportunities for improvement? Were there other things that could have been better?** - **What do you think could go wrong before/during your hospital admission, aside from your illness? What were you concerned about? *(Other patients mentioned: collaboration, information transfer/records, medication, expectations, having someone to talk to)*** - **What went differently than you expected beforehand? What was the cause?** - **Do you have any tips/recommendations?**   **Emotions:**   - **Can you describe what emotions you experienced? And what triggered these emotions? *(Anxious, relieved, etc.)***   **Important factors:**   - **Can you indicate what you find important? And why do you find this important?** |

| Phase 2: Hospital phase | |
| --- | --- |
| Time | - **How long have you been on this ward?** |
| Collaboration | - **Can you describe to what extent the staff on the ward was aware of your situation when you arrived?** |
| Generic | - **Can you tell us how your hospital stay on this ward has been so far? (Waiting time, care provided, quality of care, collaboration between doctors, shared decision-making (SDM), communication/information—see topic 7)** |
| Care quality | - **What examinations/treatments have you received while on this ward?** - **What do you think of how these examinations/treatments were carried out?** - **What do you think of the other care you received on the ward? (e.g., food, hygiene)** - **Can you comment on the expertise of the doctors/nurses?** - **What made the care (in)sufficient, and where do you see room for improvement?** |
| Communication and DM | - **How did you experience communication with the doctors and nurses on the ward? (What could have been better? Understandable; feeling heard; information about treatment/expectations)** - **Can you tell us what the doctor discussed with you at the ER/GP post? What did you think of it? Did you miss any information?** - **To what extent did you feel involved in the decisions made about your treatment/examinations? Can you give an example?** |
| Context | - **What do you think of the ward and your room? (Atmosphere, space, view, privacy)** |
| Experiences | - **What (other) positive/negative experiences have you had during your hospital stay?** - **What went well/not well, and what could have been better? How could these things have been improved in your opinion?** - **Do you have any tips/recommendations?** |
| Emotions | - **Can you describe what emotions you experienced when you were at the ER/GP post?** |
| Needs/ desires | - **Can you indicate what you find important during a hospital stay? (Communication, expertise, collaboration, information, SDM, etc.)** - **And why do you find this important?** |
| Risk moment | - **What do you think could go wrong during a hospital stay? What are you concerned about? (Collaboration between doctors, information transfer/records, medication, care, expectations, future, family as a sounding board, etc.)** - **What went differently than you expected beforehand? What was the cause?** |

| Phase 3: Post hospital phase | |
| --- | --- |
| Introduction Situation | - **What do you think could go wrong during a hospital stay? What are you concerned about?** - **(Collaboration between doctors, information transfer/records, medication, care, expectations, future, family as a sounding board, etc.)** - **What went differently than you expected beforehand? What was the cause?** |
| Discharge process | **Discharge process:**   - **How long did you have to wait before you were actually discharged?** - **Can you describe how the discharge from the hospital went? How long did you have to wait before you were actually discharged?**   - **How was the communication with the healthcare providers during discharge? (Understandable; feeling heard; information about treatment/expectations)**   - **What did the doctor discuss with you at the ER/GP post? What did you think of it? Did you miss any information?**   - **Did you feel involved in the decisions made about your discharge?**   **Experiences:**   - **Can you tell us about your positive/negative experiences during your discharge? What caused them?**   **Improvement points:**   - **Were there things that could have been better during your discharge?**   **Emotions:**   - **Can you describe what emotions you experienced when you were discharged?** - **And what emotions are you experiencing now?**   **Risk moments:**   - **What do you think could go wrong after being discharged? (Collaboration, information transfer/records, medication, expectations, having someone to talk to)** - **What did you expect from the post-discharge phase? And how did it turn out in practice**   **Important factors:**   - **Can you indicate what you find important when being discharged?** |
| Transfer/after discharge | - **Can you tell us who you had contact with after returning home?** - **How did you experience contact with these healthcare providers?**   - **How was the feedback from these doctors? Was the right information shared? Any contradictions?** - **Can you tell us about your positive/negative experiences during the handover? What contributed to these?** - **Aids, errors, information transfer** - **Did anything go differently than you expected? If so, what was the cause?** |
| Aftercare evaluation | - **How long did you have to wait before receiving home care / being admitted to a rehabilitation center or nursing home?** - **Can you tell us how you were informed about the aftercare options?**   - **What did the doctor discuss with you? What did you think of it? Did you miss any information?**   - **Did you feel involved in the decisions made about your aftercare?**   **Knowledge/quality of care:**   - **What do you think of the care you are currently receiving? What makes it (in)sufficient?**   **Context:**   - **What do you think of the ward/room you are in now? / What do you think of being at home now?**   **Important factors:**   - **Can you indicate what you find important when receiving aftercare?**   **Experiences:**   - **Can you tell us about your positive/negative experiences during your discharge? What caused them?**   **Improvement:**   - **Were there things that could have been better during your discharge?**   **Emotions:**   - **Can you describe what emotions you experienced when you were discharged?** **And what triggered these emotions? (Anxious, relieved, etc.)**   **Risk moments:**   - **What do you think could go wrong when receiving aftercare? What were you concerned about?** - **What did you expect from your aftercare? And how did it turn out in practice?** |
